# Supplementary figures and images for: The Young Carers’ Journey: A Systematic Review and Meta Ethnography
Source: MDPI journal article supplement (doi:10.3390/ijerph19105826), 2022-05-10

**Figure S1.** PRISMA Flow Diagram.

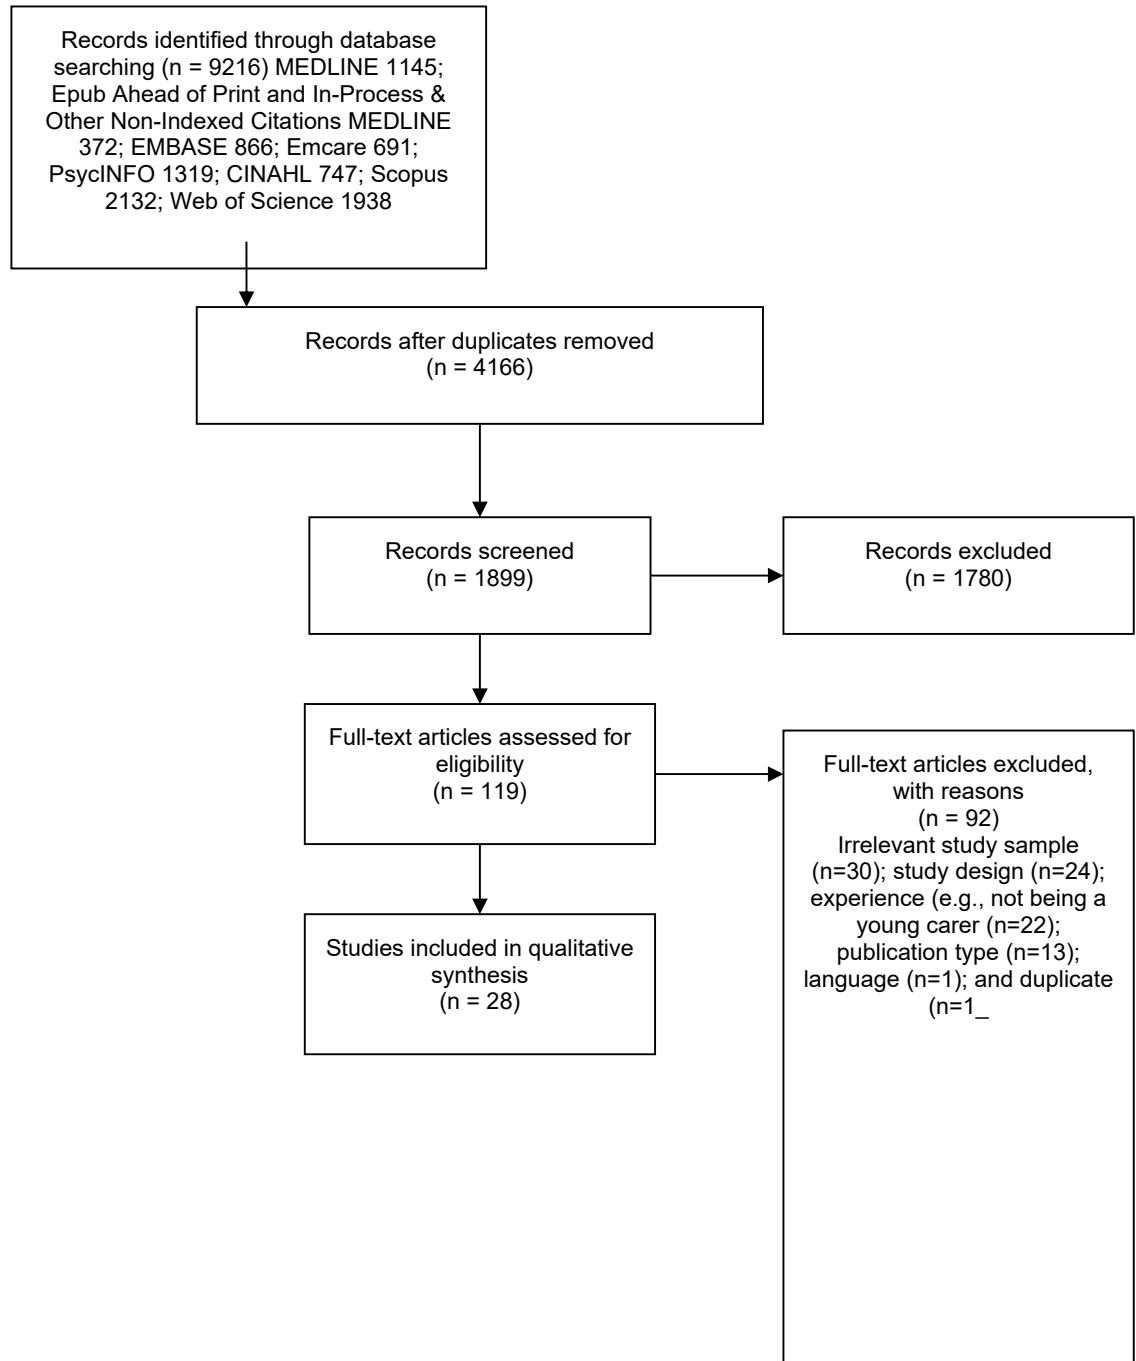

Supplement: s1 [file s1]
